# Supplementary material
Source: Springer Nature journal article supplement (https://www.springermedizin.de/resource/supplementary/12936_2008_757_MOESM3_ESM.pdf/9549036)

March 2007 (Wet Season)

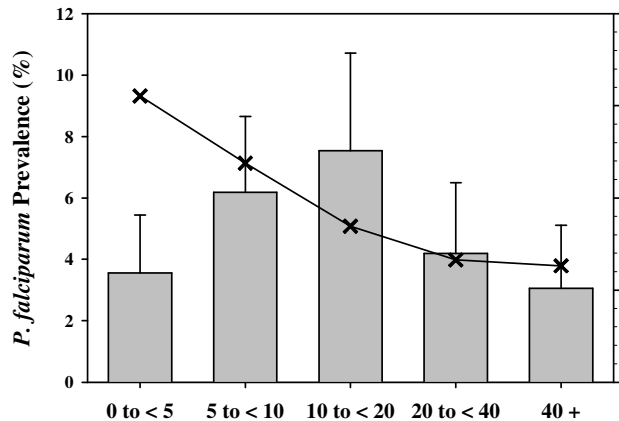

August 2007 (Dry Season)

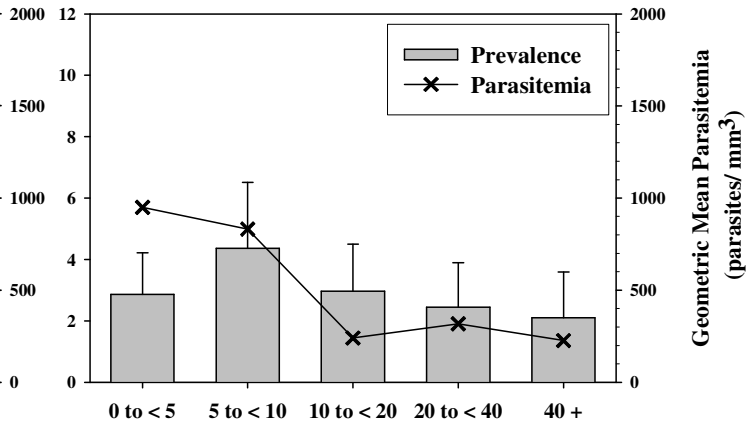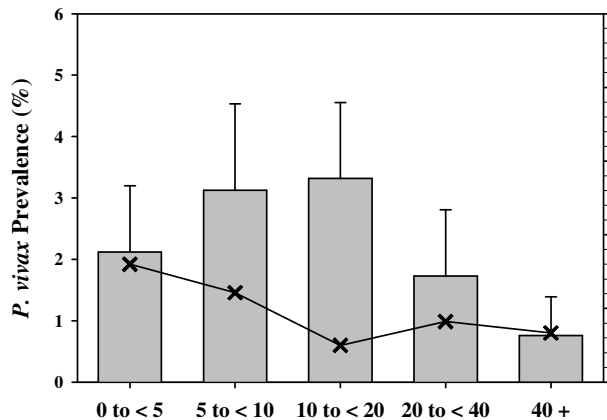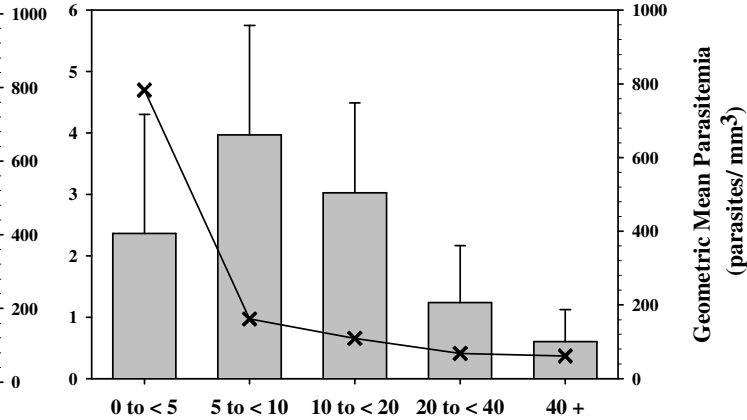

Age (years)

Age (years)

Supplement: MOESM3 [file 9549036]
